# Supplementary material for: Characteristics of mechanical properties of sulphur cross-linked guayule and dandelion natural rubbers
Source: Royal Society of Chemistry journal article supplement (doi:10.1039/c7ra08554k), 2017-01-01
Supplement: c7ra08554k1.pdf [file c7ra08554k1.pdf]

# Supporting information for the manuscript

## Characteristics of mechanical properties of sulphur cross-linked guayule and dandelion natural rubbers

Preeyanuch Junkong<sup>a</sup>, Katrina Cornish<sup>b</sup>, and Yuko Ikeda<sup>c\*</sup>

<sup>a</sup>*Graduate School of Science and Technology, Kyoto Institute of Technology, Matsugasaki, Sakyo, Kyoto 606-8585, Japan*

<sup>b</sup>*Departments of Food, Agricultural and Biological Engineering, and Horticulture and Crop Science, Ohio Agricultural Research and Development Center, The Ohio State University, Wooster, OH 44691, U. S. A.*

<sup>c</sup>*Faculty of Molecular Chemistry and Engineering, Kyoto Institute of Technology, Matsugasaki, Sakyo, Kyoto 606-8585, Japan*

\*Corresponding author  
E-mail: [yuko@kit.ac.jp](mailto:yuko@kit.ac.jp).

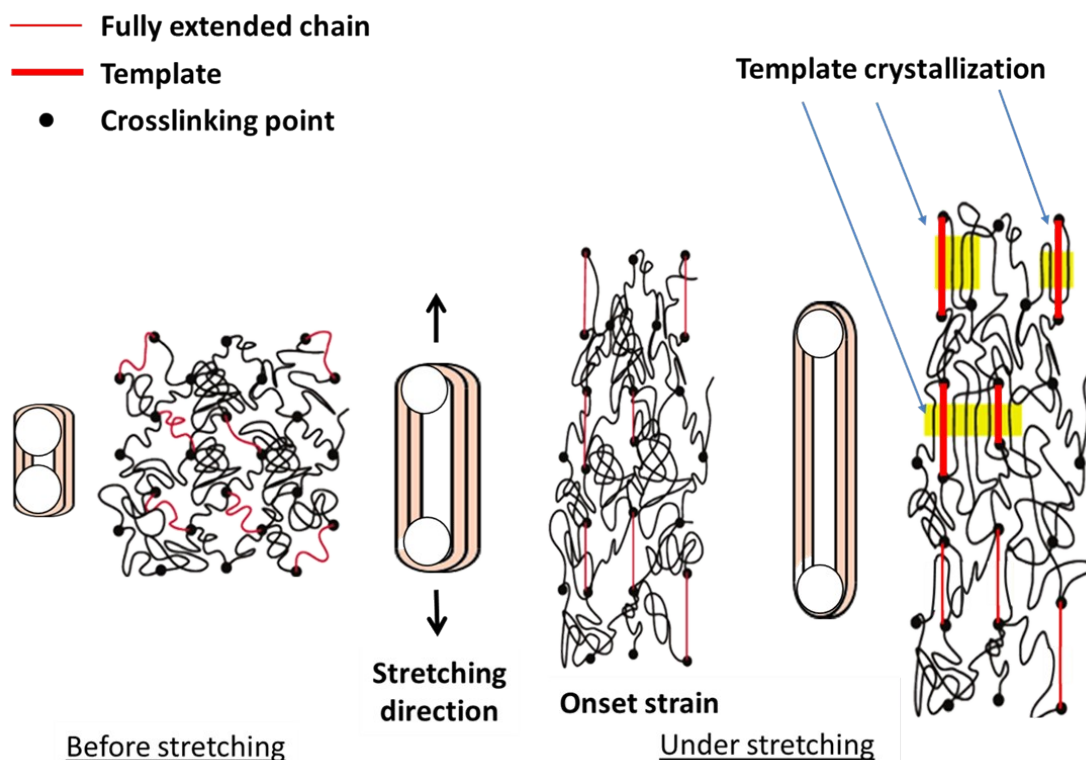

**Figure S1.** Crystallization schemata on SIC of cross-linked NR. Relatively short extended chains are drawn as thick lines. Filled circles represent cross-links. Under stretching, fully extended chains just at the onset of crystallization are shown. Further stretching shows the fully stretched chains have acted as a template of crystallization, and shaded parts show crystallites formed under elongation [63-65].

## References

63. S. Kohjiya and Y. Ikeda, *Crystallization of natural rubber*, Paper presented at the 191<sup>st</sup> Technical Meeting, Rubber Division, American Chemical Society, Beachwood, OH, Akron, April 25 2017.
64. Y. Ikeda, A. Kato, S. Kohjiya and Y. Nakajima, *Rubber Science, A modern Approach*, Springer, Singapore, 2017.
65. S. Kohjiya, P. Junkong and Y. Ikeda, *Kautsch. Gummi Kunstst.* 2017, **10**, 38-48.
